# Supplementary material for: Celiac Disease and Risk of Subsequent Type 1 Diabetes
Source: Oxford University Press journal article supplement (doi:10.2337/dc06-0794), 2006-10-26
Supplement: pg2483onlineappendix.doc [file pg2483onlineappendix.doc]

# Appendix

**Cumulative risk** of (A) type 1 diabetes mellitus and (B) ketoacidosis/diabetic coma diagnosed before age 20 years.

Cumulative risk = 1-survival

NB. First year excluded. NB. Y-axis scales are not identical.

**Type 1 diabetes mellitus Ketoacidosis or diabetic coma**

**The proportional hazard assumption** was tested with log minus log plots.

Parallel lines indicate that the proportional hazard assumption is not violated.

**Type 1 diabetes mellitus Ketoacidosis or diabetic coma**

**Characteristics of participants:**

**Table *- Characteristics of participants (No (%))***

| Characteristics | **Reference**  **(No celiac disease)**  **(%)** | **Celiac disease**  **(%)** |
| --- | --- | --- |
|  |  |  |
| **Total** | 45,680 | 9,243 |
|  |  |  |
| **Age at first recorded diagnosis of celiac disease (years)** |  |  |
| 0-2 |  | 7,090 (76.7) |
| 3-19 |  | 2,153 (23.3) |
|  |  |  |
| **Sex** |  |  |
| Male | 19,210 (42.1) | 3,889 (42.1) |
| Female | 26,470 (57.9) | 5,354 (57.9) |
|  |  |  |
| **Calendar Period** |  |  |
| 1964-1973 | 1,292 (2.8) | 265 (2.9) |
| 1974-1983 | 13,222 (28.9) | 2,671 (28.9) |
| 1984-1993 | 22,165 (48.5) | 4,485 (48.5) |
| 1994-2003 | 9,001 (19.7) | 1,822 (19.7) |
|  |  |  |
| **Socioeconomic index** |  |  |
| I | 4,707 (10.3) | 968 (10.5) |
| II | 5,694 (12.5) | 1,278 (13.8) |
| III | 13,979 (30.6) | 3,590 (38.8) |
| Missing data | 21,300 (46.6) | 3,407 (36.9) |

Individuals with more than one year of follow-up after celiac disease diagnosis or corresponding date in matched individuals. See also text.

Socioeconomic index. “I” is highest category. See also text.

For reference individuals we have given the number of individuals who constituted the basis for the Cox regression. We actually had data on socioeconomic index in another 4,048 reference individuals but these individuals were not part of the internally stratified calculations due to missing values on socioeconomic index in the matched individual with celiac disease. Adding the 4,048 reference individuals to those presented above, the proportion of missing values was similar among individuals with celiac disease and reference individuals.
